# Supplementary material for: Notch3 Maintains Luminal Phenotype and Suppresses Tumorigenesis and Metastasis of Breast Cancer via Trans-Activating Estrogen Receptor-α
Source: PubMed Central journal article supplement — Theranostics. 2017 Sep 20;7(16):4041–56. doi: 10.7150/thno.19989 (PMC5667424; doi:10.7150/thno.19989), 2017-09-20
Supplement: thnov07p4041s1.pdf [file thnov07p4041s1.pdf]

**Table S1. Correlation between Notch3 expression and clinicopathological factors in patients with breast cancer**

| Clinicopathological features | Notch3 (n=60)   |                 | $\chi^2$ | P value |
|------------------------------|-----------------|-----------------|----------|---------|
|                              | Negative (n=17) | Positive (n=43) |          |         |
| <b>Age (year)</b>            |                 |                 |          |         |
| <50                          | 11              | 19              | 2.052    | 0.252   |
| ≥50                          | 6               | 24              |          |         |
| <b>Menstrual conditions</b>  |                 |                 |          |         |
| premenopausal                | 11              | 27              | 0.019    | 1       |
| postmenopausal               | 6               | 16              |          |         |
| <b>Tumor size (cm)</b>       |                 |                 |          |         |
| <2                           | 0               | 3               | 2.144    | 0.37    |
| ≥2, <5                       | 12              | 24              |          |         |
| ≥5                           | 4               | 15              |          |         |
| <b>LN metastasis</b>         |                 |                 |          |         |
| Negative                     | 2               | 18              | 4.966    | 0.034*  |
| Positive                     | 15              | 25              |          |         |
| <b>Stage</b>                 |                 |                 |          |         |
| I                            | 0               | 1               | 1.071    | 0.871   |
| II                           | 6               | 20              |          |         |
| III                          | 9               | 21              |          |         |
| IV                           | 0               | 1               |          |         |
| <b>ER expression</b>         |                 |                 |          |         |
| Negative                     | 11              | 13              | 6.033    | 0.020*  |
| Positive                     | 6               | 30              |          |         |
| <b>PR expression</b>         |                 |                 |          |         |
| Negative                     | 12              | 13              | 8.163    | 0.008** |
| Positive                     | 5               | 30              |          |         |
| <b>HER-2 expression</b>      |                 |                 |          |         |
| Negative                     | 15              | 26              | 3.573    | 0.111   |
| Positive                     | 2               | 15              |          |         |

**Table S2. Oligonucleotide sequences for siRNA constructs used in real-time PCR and CHIP and EMSA assays**

| Assay                      | Sequences (5' to 3')       | Amplicon (bp) |
|----------------------------|----------------------------|---------------|
| <b>RT-PCR</b>              |                            |               |
| Notch3                     | F ATGCAGGATAGCAAGGAGGA     | 86            |
|                            | R AAGTGGTCCAACAGCAGCTT     |               |
| ER $\alpha$                | F CTCTCCCACATCAGGCACA      | 157           |
|                            | R CTTTGGTCCGTCTCCTCCA      |               |
| E-cadherin                 | F AAAGGCCCATTTCTATAAAACCT  | 172           |
|                            | R TGC GTTCTCTATCCAGAGGCT   |               |
| Vimentin                   | F GACCCATCAACACCGAGTT      | 238           |
|                            | R CTTTGTGCTTGGTTAGCTGGT    |               |
| $\beta$ -actin             | F GAGACCTCAACACCCAGCC      | 264           |
|                            | R AATGTCACGCACGATTTCCC     |               |
| <b>siRNA</b>               |                            |               |
| siNotch3 #1                | UAUAGGUGUUGACGCCAUCCACGCA  |               |
| siNotch3 #2                | GAGCCAAUAAGGACAUGCA        |               |
| siER $\alpha$              | CGAGUAUGAUCCUACCAGA        |               |
| siNC                       | UUCUCCGAACGUGUCACGU        |               |
| <b>ChIP</b>                |                            |               |
| ER $\alpha$ P1             | F CAGTTCCCCCAGCTGCTAAA     |               |
|                            | R GGCTTTCTCTAATGTGCTGCCTTA |               |
| ER $\alpha$ P2             | F GGGCACATAAGGCAGCACAT     |               |
|                            | R CCCTGACATTGGCTTAAACATCAC |               |
| NC                         | F AACTGAGGTCCTGGCAGGTT     |               |
|                            | R CGTTGGCTAGAAATACGTAGTG   |               |
| <b>EMSA</b>                |                            |               |
| probe or competitor 1 (P1) | AACGAGGAGGGGGAATCAAACAG    |               |
| P1 mutant                  | AACGAGGAGGTGTCTTCAAACAG    |               |
| probe or competitor 1 (P2) | TAAAGTTCAAGGAAGCTGCTCTTT   |               |
| P2 mutant                  | TAAAGTTCAATAGCGCTGCTCTTT   |               |

**Table S3. Proteins and description of corresponding antibodies**

| <b>Antibodies</b> | <b>Vendor</b> | <b>Source</b> | <b>Catalog NO.</b> |
|-------------------|---------------|---------------|--------------------|
| Notch1            | CST           | Rabbit/mono   | 3439               |
| Notch2            | CST           | Rabbit/mono   | 4530               |
| Notch3            | CST           | Rabbit/mono   | 5276               |
| Notch4            | CST           | Mouse/mono    | 2423               |
| ER $\alpha$       | CST           | Rabbit/mono   | 8644               |
| E-cadherin        | CST           | Rabbit/mono   | 3195               |
| Vimentin          | CST           | Rabbit/mono   | 5741               |
| P27               | Santa Cruz    | Rabbit/mono   | 3686               |
| $\beta$ -actin    | Santa Cruz    | Mouse/mono    | Sc-47778           |
| ER $\alpha$       | Santa Cruz    | Mouse/mono    | Sc-8002            |
| Notch3            | Santa Cruz    | Rabbit/mono   | Sc-5593            |

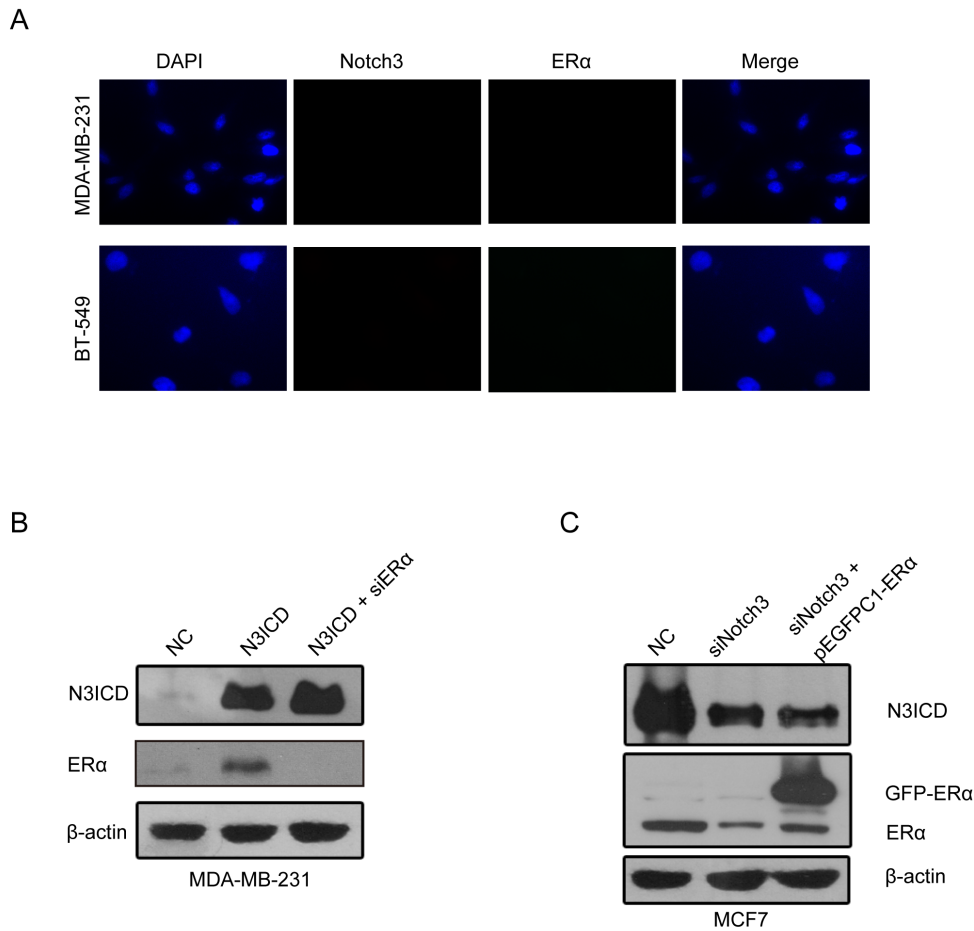

**Supplementary Figure 1 (A)** Immunofluorescence staining for Notch3 and ER $\alpha$  in MDA-MB-231 (upper panel) and BT-549 (bottom panel) cells. Nuclei were stained with DAPI (4', 6-diamidino-2-phenylindole). A merged image was obtained by combining Notch3, ER $\alpha$  and DAPI fluorescent staining images. **(B)** Western blot showing the protein levels of N3ICD and ER $\alpha$  after overexpressing N3ICD and transfecting ER $\alpha$  RNAi in MDA-MB-231 cells. **(C)** Western blot showing the protein levels of Notch3 and ER $\alpha$  after transfecting Notch3 RNAi and overexpressing pEGFPC1-ER $\alpha$  in MCF-7 cells.
